# Supplementary material for: Why more junctions do not yet deliver: interconnection challenges in perovskite multijunction solar cells
Source: Royal Society of Chemistry journal article supplement (doi:10.1039/d6ee01631f), 2026-06-18
Supplement: d6ee01631f1.pdf [file d6ee01631f1.pdf]

## Benchmark of Recombination Junction Architectures in Perovskite Multijunction Solar Cells

| #       | 1st author / Year | RJ stack (and adjacent layers, manufacture bottom to top)                       | RJ Deposition                                                       | RJ Key innovation                                                               | PCE (%)                      | V <sub>oc</sub> (V) | FF (%) | J <sub>sc</sub> (mA/cm <sup>2</sup> ) | Active / Aperture area (cm <sup>2</sup> ) | Cert. body     | Stability metrics                                                                    | DOI                           | Citation                                               |
|---------|-------------------|---------------------------------------------------------------------------------|---------------------------------------------------------------------|---------------------------------------------------------------------------------|------------------------------|---------------------|--------|---------------------------------------|-------------------------------------------|----------------|--------------------------------------------------------------------------------------|-------------------------------|--------------------------------------------------------|
|         |                   |                                                                                 |                                                                     |                                                                                 | (lab if no certified report) |                     |        |                                       |                                           |                |                                                                                      |                               |                                                        |
| Silicon |                   |                                                                                 |                                                                     |                                                                                 | Perovskite                   |                     |        |                                       |                                           |                |                                                                                      |                               |                                                        |
| 1       | Mailoa 2015       | a-Si / Si / TiO <sub>2</sub> / mp-TiO <sub>2</sub> / PK                         | PECVD / PECVD / ALD / spin-coat / spin-coat                         | First Si/PK tandem with tunnel junction                                         | 13.7                         | 1.58                | 75     | 11.5                                  | 1                                         | n.r.           | n.r.                                                                                 | 10.1063 / 1.4914 179          | Mailoa J. et al., Appl. Phys. Lett. 106, 121105 (2015) |
| 2       | Bush 2017         | a-Si / ITO / NiO <sub>x</sub> / PK                                              | PECVD / sputter / spin-coat                                         | not at RJ; ALD/pulsed-CVD SnO <sub>2</sub> /ZTO                                 | 23.6                         | 1.65                | 79.0   | 18.1                                  | 1.1 / 1                                   | NREL           | only PK SJ reported                                                                  | 10.1038 / nenergy.2017.9      | Bush K.A. et al., Nat. Energy 2, 17009 (2017)          |
| 3       | Hou 2020          | a-Si / InO <sub>x</sub> / NiO <sub>x</sub> / PK                                 | PECVD / sputter / sputter / spin-coat                               | not at RJ: 1-butanethiol limits WBG phase separation                            | (25.7 stab.)                 | 1.7932              | 73.66  | 15.88                                 | 0.832                                     | Fraunhofer ISE | 100% after 400 h, 40 °C; 100% after 400 h, 85 °C, both MPPT                          | 10.1126 / science.aaz3691     | Hou. Y et al., Science 367, 1135-1140 (2020)           |
| 4       | Al-Ashouri 2020   | a-Si / nc-SiO <sub>x</sub> (n) / ITO / Me-4PACz / PK                            | PECVD / PECVD / DC sputter / spin-coat                              | SAM on ITO                                                                      | 29.14                        | 1.91                | 78.87  | 19.36                                 | 1.13 / 1.04                               | Fraunhofer ISE | >95% after 300 h (MPPT, air, 25 °C, 30-40%RH)                                        | 10.1126 / science.abd4016     | Al-Ashouri A. et al., Science 370, 1300-1309 (2020)    |
| 5       | Mao 2022          | a-Si / ITO / NiO <sub>x</sub> 2PACz / PK                                        | RF-PECVD / DC sputter / RF sputter / spin-coat                      | ITO / NiO <sub>x</sub> / SAM enables fully textured Si wafers                   | 28.84                        | 1.794               | 79.95  | 20.11                                 | 1.2 / 1.2                                 | NIMTT          | n.r.                                                                                 | 10.1002 / adma.202206193      | Mao L. et al., Adv. Mater. 34, 2206193 (2022)          |
| 6       | Mariotti 2023     | a-Si / nc-SiO <sub>x</sub> / ITO / Me-4PACz (+HDPA) / PK                        | PECVD / PECVD / sputter / spin-coat / spin-coat                     | not at RJ: PI at PK / C <sub>60</sub> interface                                 | 32.5                         | 1.98                | 81.18  | 20.24                                 | ~1                                        | JRC-ESTI       | 80% after 347 h (MPPT, air, 23-32 °C)                                                | 10.1126 / science.adf5872     | Mariotti S. et al., Science 381, 63-69 (2023)          |
| 7       | Chin 2023         | a-Si / nc-SiO <sub>x</sub> (n,p) / ITO / Me-4PACz / PK                          | PECVD / PECVD / sputter / spin-coat / spin-coat                     | not at RJ: FBPAc at PK / C <sub>60</sub> interface                              | 31.25                        | 1.91                | 79.8   | 20.47                                 | 1.2 / 1.1677                              | NREL           | MPPT after 1 year inert storage, 80% after 66 h, air, 65 °C                          | 10.1126 / science.adg0091     | Chin X.Y. et al., Science 381, 59-63 (2023)            |
| 8       | Aydin 2023        | a-Si / nc-Si / IZO / 2PACz / PK                                                 | PECVD / PECVD / RF sputter / spin-coat / spin-coat                  | ultrathin IZO at RJ                                                             | 32.7 (32.5 stab.)            | 1.947               | 80.0   | 22.16                                 | 1.055                                     | JET            | 90% after 870 h, MPPT, RT                                                            | 10.1038 / s41586-023-06667-4  | Aydin E. et al., Nature 623, 732-738 (2023)            |
| 9       | Ugur 2024         | a-Si / nc-Si / IZO / Me-4PACz / PK                                              | PECVD / PECVD / RF sputter / spin-coat / spin-coat                  | not at RJ: in-situ THTZ formation for PK                                        | 33.9 (33.7 stab.)            | 1.974               | 81.33  | 21.167                                | 1.0035                                    | ESTI           | >90% after 1000 h, MPPT, 25 °C                                                       | 10.1126 / science.adp1621     | Ugur E. et al., Science 385, 533-538 (2024)            |
| 10      | Turkay 2024       | a-Si / nc-Si / nc-SiO <sub>x</sub> / ITO / Me-4PACz / SiO <sub>2</sub> -NP / PK | PECVD / PECVD / PECVD / sputter / spin-coat / spin-coat / spin-coat | SiO <sub>2</sub> -NP sublayer between ITO and SAM                               | 30.93                        | 1.953               | 79.9   | 19.812                                | 1.17                                      | Fraunhofer ISE | >85% after 84 h, no encapsulation, light cycle, ISOS-LC-1, ambient, 25 °C, 30-50% RH | 10.1016 / j.joule.2024.04.015 | Turkay D. et al., Joule 8, 1735-1753 (2024)            |
| 11      | Kan 2024          | a-Si / nc-SiO <sub>x</sub> / ITO / CuSCN / PK                                   | PECVD / PECVD / sputter / co-spin-coat                              | inorganic CuSCN grains replaces SAM                                             | 31.38 (31.02 stab.)          | 1.927               | 78.59  | 20.666                                | 0.9972                                    | SIMIT          | 93.8% after 1200 h (45 °C); 90.2% after 1000 h (85°C/85% RH), both MPPT              | 10.1038 / s41586-024-01561-5  | Kan C. et al., Nat. Photon. 19, 63-70 (2025)           |
| 12      | Liu 2024          | a-Si / nc-SiO <sub>x</sub> / IZO / MeO-4PACz / PK                               | PECVD / PECVD / sputter / spin-coat / spin-coat                     | not at RJ: bilayer passivation with LiF and EDAl; double-side textured SHJ cell | 33.89                        | 1.9657              | 83.0   | 20.761                                | 1.004                                     | NREL           | 80% after 1200 h, MPPT, RT                                                           | 10.1038 / s41586-024-07997-7  | Liu J. et al., Nature 635, 596-603 (2024)              |
| 13      | Liu 2024          | a-Si / a-Si / ITO / MeO-2PACz / PK                                              | PECVD / PECVD / sputter / spin-coat / evap.                         | not at RJ: evap. 3D/3D PK heterojunction                                        | 32.13 (31.5 stab.)           | 1.87                | 83.33  | 20.65                                 | 1.015                                     | SIMIT          | >95% after 800 h, ISOS-L-1, 30 °C, 35% RH; >94%                                      | 10.1016 / j.joule.2024.06.    | Liu Z. et al., Joule 8, 2834-2850 (2024)               |

| #                 | 1st author / Year      | RJ stack (and adjacent layers, manufacture bottom to top)                    | RJ Deposition                                                    | RJ Key innovation                                                           | PCE (%)                      | V <sub>oc</sub> (V) | FF (%) | J <sub>sc</sub> (mA/cm <sup>2</sup> ) | Active / Aperture area (cm <sup>2</sup> ) | Cert. body     | Stability metrics                                                                                     | DOI                                    | Citation                                                           |  |
|-------------------|------------------------|------------------------------------------------------------------------------|------------------------------------------------------------------|-----------------------------------------------------------------------------|------------------------------|---------------------|--------|---------------------------------------|-------------------------------------------|----------------|-------------------------------------------------------------------------------------------------------|----------------------------------------|--------------------------------------------------------------------|--|
|                   |                        |                                                                              |                                                                  |                                                                             | (lab if no certified report) |                     |        |                                       |                                           |                |                                                                                                       | after 500 h ISOS-L-2, 65 °C, both MPPT | 015                                                                |  |
| 14                | Chen 2024              | a-Si / a-Si / ITO / poly-TPD / PK                                            | PECVD / PECVD / sputter / spin-coat / spin-coat                  | not at RJ: OA stabilization of WBG PK                                       | 32.2 (32.0 stab.)            | 1.942               | 81.27  | 19.56                                 | 0.95884                                   | NIM            | 98.3% after 1301 h, ISOS-L-1; >90% after 800 h, ISOS-L2, both MPPT                                    | 10.1126 /science .ad9104               | Chen H., Yang C. et al., Science 385, 554–560 (2024)               |  |
| 15                | Liu 2024               | a-Si / nc-Si (n) / nc-Si (p) / Spiro-TTP / PK                                | PECVD / PECVD                                                    | nc-Si tunneling junction                                                    | 30.05 (29.4 stab.)           | 1.81                | 82.91  | 20.01                                 | 0.5003                                    | n.r.           | >98% after 700 h, 25 °C, 30-40% RH, MPPT; >90% after 1500 h, 85°C in N <sub>2</sub> , MPPT            | 10.1007 /s40820 -024-01406-4           | Liu J., Shi B., Xu Q. et al., Nano-Micro Lett. 16, 189 (2024)      |  |
| 16                | Chozas-Barrientos 2025 | a-Si / (C <sub>60</sub> (n) / TaTm (p) / TaTm-CS9 / TaTm / PK                | PECVD / Full thermal evap.                                       | all-organic RJ with n-doped C60 (+PhIM) and p-doped TaTm (+F6-TCNNQ)        | 22.19                        | 1.78                | 69.86  | 17.81                                 | n.r.                                      | n.r.           | n.r.                                                                                                  | 10.1021 /acsenergylett.5c00155         | Chozas-Barrientos S. et al., ACS Energy Lett. 10, 1733–1740 (2025) |  |
| 17                | Kore 2025              | a-Si / ITO / 2PACz / TaTm / PK                                               | PECVD / sputter / evap. / evap. / spin-coat                      | sputter ITO with evap. organic RJ (2PACz + TaTm)                            | 29.6 (29.6 stab.)            | 1.848               | 79.6   | 20.1                                  | 1                                         | n.r.           | Only <60 min MPPT or storage                                                                          | 10.1039 /D4EE03899A                    | Kore B.P., Er-raji O., Fischer O. et al., EES 18, 354–366 (2025)   |  |
| 18                | Er-raji 2025           | a-Si / ITO / Me-4PACz / PK                                                   | PECVD / sputter / spin-coat / evap.-spin-coat                    | not at RJ: electron accumulation at C <sub>60</sub> interface increases PCE | (31.6 stab.)                 | 1.925               | 80.9   | 20.30                                 | 0.9961                                    | Fraunhofer ISE | 83.4% after 1000 h ISOS-D-3, 85°C, 85% RH, MPPT                                                       | 10.1126 /science .adx1745              | Er-raji O. et al., Science 390, eadx1745 (2025)                    |  |
| 19                | Zhang 2025             | a-Si / nc-Si / IZO / CL-SAM / PK                                             | PECVD / PECVD / sputter / spin-coat / spin-coat                  | cross-linked SAM                                                            | 33.8 (33.61 stab.)           | 1.974               | 81.68  | 21.888                                | 1                                         | NPCC           | >97% after 1200 h ISOS-L-2, 65°C, MPPT                                                                | 10.1126 /science .ady6874              | Zhang X., Luo Y. et al., Science 390, 837–842 (2025)               |  |
| 20                | Wang 2025              | a-Si / nc-SiO <sub>x</sub> / RPD ICO:H / Me-4PACz / PK                       | PECVD / PECVD / RPD sputter / spin-coat / spin-coat              | reactive-plasma-deposited Ce and H doped ICO                                | 33.6 (33.2 stab.)            | 2.015               | 81.9   | 20.36                                 | 1                                         | CPVT           | >90% after 1000 h, 85°C, 85% RH, MPPT                                                                 | 10.1038 /s41586 -025-09849-4           | Wang S. et al., Nature 649, 59–64 (2026)                           |  |
| 21                | Liu 2025               | a-Si / ITO / NiOx / Me-4PACz / np-Al <sub>2</sub> O <sub>3</sub> / PK        | PECVD / sputter / spin-coat / spin-coat / spray-coat / spin-coat | spray-coat Al <sub>2</sub> O <sub>3</sub> on SAM enhances PK coverage       | 32.69                        | 1.959               | 82     | 20.43                                 | 1.0037                                    | NIMC           | only >90% after 500 h, RT, N <sub>2</sub> atmosphere, MPPT                                            | 10.1038 /s41467 -025-64546-0           | Nat. Commun. (2025)                                                |  |
| 22                | Zhang 2025             | a-Si / nc-SiO <sub>x</sub> / ITO / SiO <sub>x</sub> nanospheres / 2PACz / PK | PECVD / PECVD / sputter / spin-coat / spin-coat / spin-coat      | localized submicron contacts through SiO <sub>x</sub> nanospheres           | 33.15 (33.08 stab.)          | 1.95                | 81.07  | 20.92                                 | 1                                         | SIMIT          | 86.7% after 1100 h, ISOS-D3, 85°C, 85% RH; 91.7% after 1000 h ISOS-L-2I, 80 °C, N <sub>2</sub> , MPPT | 10.1038 /s41467 -025-62389-3           | Nat. Commun. (2025)                                                |  |
| 23                | Longi 2025             | n.r.                                                                         | n.r.                                                             | n.r.                                                                        | 35                           | 2.007               | 84.3   | 20.76                                 | 1.0028                                    | NREL           | n.r.                                                                                                  | press release                          | LONGi press release + NREL chart (on April 2026)                   |  |
| <b>Perovskite</b> |                        |                                                                              |                                                                  |                                                                             |                              |                     |        |                                       |                                           |                |                                                                                                       |                                        |                                                                    |  |
| 24                | Yu 2020                | C <sub>60</sub> / SnO <sub>2-x</sub> / PK                                    | evap. / low temp. ALD / spin-coat                                | simplified 2 layer RJ                                                       | 24.6                         | 2.03                | 79.7   | 15.2                                  | 0.059                                     | n.r.           | 94% after 1000 h, ambient, RT. MPPT                                                                   | 10.1038 /s41560 -020-0657-y            | Yu Z. et al., Nat. Energy 5, 657–665 (2020)                        |  |
| 25                | Xiao 2020              | C <sub>60</sub> / SnO <sub>2</sub> / Au / PEDOT:PSS / PK                     | Evap. / ALD / evap. / spin-coat / spin-coat                      | not at RJ: improved Sn oxidation stability through zwitterion               | 24.2 (24.2 stab.)            | 1.986               | 76.63  | 16.58                                 | 1.041                                     | JET            | 88% after 500 h, 54–60 °C, ambient, MPPT                                                              | 10.1038 /s41560 -020-00705-5           | Xiao K. et al., Nat. Energy 5, 870–880 (2020)                      |  |
| 26                | Datta 2022             | C <sub>60</sub> / SnO <sub>x</sub> / Au / PEDOT:PSS / PK                     | evap. / sALD / evap. / spin-coat                                 | not at RJ: interfacial PK passivation                                       | 23.1 (23.0)                  | 1.95                | 75     | 15.8                                  | 0.09                                      | n.r.           | n.r.                                                                                                  | 10.1002 /adma.2                        | Datta K. et al., Adv. Mater. 34, 2110053                           |  |

| #  | 1st author / Year | RJ stack (and adjacent layers, manufacture bottom to top) | RJ Deposition                                   | RJ Key innovation                                                           | PCE (%)                      | V <sub>oc</sub> (V) | FF (%) | J <sub>sc</sub> (mA/cm <sup>2</sup> ) | Active / Aperture area (cm <sup>2</sup> ) | Cert. body | Stability metrics                                                                                                                            | DOI                            | Citation                                                      |  |
|----|-------------------|-----------------------------------------------------------|-------------------------------------------------|-----------------------------------------------------------------------------|------------------------------|---------------------|--------|---------------------------------------|-------------------------------------------|------------|----------------------------------------------------------------------------------------------------------------------------------------------|--------------------------------|---------------------------------------------------------------|--|
|    |                   |                                                           |                                                 |                                                                             | (lab if no certified report) |                     |        |                                       |                                           |            |                                                                                                                                              |                                |                                                               |  |
|    |                   |                                                           |                                                 |                                                                             | stab.)                       |                     |        |                                       |                                           |            |                                                                                                                                              | 10.1038/s41586-021-04372-8     | (2022)                                                        |  |
| 27 | Lin 2022          | C <sub>60</sub> / SnO <sub>2</sub> / Au / PEDOT:PSS / PK  | evap. / ALD / evap. / spin-coat / spin-coat     | not at RJ: PK passivation CF3-PA                                            | 26.3 (26.4 stab.)            | 2.044               | 77.8   | 16.53                                 | 0.04937                                   | JET        | 90% after 600 h, ambient, RT, MPPT                                                                                                           | 10.1038/s41586-021-04372-8     | Lin R. et al., Nature 603, 73-78 (2022)                       |  |
| 28 | Zhou 2022         | PCBM / SnO <sub>2</sub> / PEDOT:PSS / PK                  | spin-coat / ALD / spin-coat / spin-coat         | metal-free RJ                                                               | 23.65                        | 2.05                | 78.7   | 14.66                                 | 0.09                                      | n.r.       | only storage reported                                                                                                                        | 10.1021/acscenergylett.2c02156 | Zhou X. et al., ACS Energy Lett. 8, 502-512 (2023)            |  |
| 29 | Zhu 2023          | C <sub>60</sub> / SnO <sub>2</sub> / Au / D-A SAM / PK    | evap. / ALD / evap. / spin-coat / spin-coat     | donor-acceptor SAM replacing PEDOT:PSS                                      | 26.3                         | 2.105               | 82.3   | 15.21                                 | 0.0574                                    | JET        | 80% after 301 h, ambient, RT, MPPT                                                                                                           | 10.1038/s41560-023-01274-z     | Zhu J. et al., Nat. Energy 8, 714-724 (2023)                  |  |
| 30 | He 2023           | C <sub>60</sub> / SnO <sub>2</sub> / IZO / PEDOT:PSS / PK | evap. / ALD / sputter / spin-coat / spin-coat   | not at RJ: 4PADCB for WBG improvement                                       | 26.6 (26.4 stab.)            | 2.119               | 82.4   | 15.91                                 | 1.044                                     | JET        | 80% after 415 h, ambient, MPPT                                                                                                               | 10.1038/s41586-023-05992-y     | He R. et al., Nature 618, 80-86 (2023)                        |  |
| 31 | Lin 2023          | C <sub>60</sub> / SnO <sub>2</sub> / Au / PEDOT:PSS / PK  | evap. / ALD / evap. / spin-coat / spin-coat     | not at RJ: bilayer PK heterojunction at NBG                                 | 28.0 (28.0 stab.)            | 2.125               | 80.3   | 16.42                                 | 0.049 / 0.04952                           | JET        | 93% after 600 h, ambient, MPPT                                                                                                               | 10.1038/s41586-023-06278-z     | Lin R. et al., Nature 620, 994-1000 (2023)                    |  |
| 32 | Liu 2023          | C <sub>60</sub> / SnO <sub>2</sub> / ITO NCs / 2PACz / PK | evap. / ALD / spin-coat / spin-coat / spin-coat | SAM RJ without PEDOT:PSS                                                    | 28.1                         | 2.11                | 79.5   | 16.7                                  | 0.049                                     | n.r.       | 90% after 500 h, ambient, 45 °C, MPPT                                                                                                        | 10.1002/anie.202313374         | Liu C. et al., Angew. Chem. Int. Ed. 62, e202313374 (2023)    |  |
| 33 | Pan 2024          | C <sub>60</sub> / SnO <sub>2</sub> / Au / PEDOT:PSS / PK  | evap. / ALD / evap. / spin-coat / spin-coat     | not at RJ: surface chemical polishing on Sn-Pb minimizes non-radiative loss | 28.80                        | 2.13                | 84.19  | 16.06                                 | 0.0871                                    | n.r.       | 79.7% after 550 h, MPPT                                                                                                                      | 10.1038/s41467-024-51703-0     | Pan Y. et al., Nat. Commun. 15, 7335 (2024)                   |  |
| 34 | Wang 2024         | C <sub>60</sub> / SnO <sub>2</sub> / Au / PEDOT:PSS / PK  | evap. / ALD / evap. / spin-coat / spin-coat     | not at RJ: 2D PK layer homogenizes WBG/ETL interface                        | 28.5                         | 2.17                | 80.2   | 16.4                                  | 1.05                                      | n.r.       | n.r.                                                                                                                                         | 10.1038/s41586-024-08158-6     | Wang Y. et al., Nature 635, 867-873 (2024)                    |  |
| 35 | Gao 2024          | C <sub>60</sub> / SnO <sub>2</sub> / Au / PEDOT:PSS / PK  | evap. / ALD / evap. / blade-coat / blade-coat   | not at RJ: notable Module size up-scale result                              | 24.9 (24.5 stab.)            | 17.22               | 78.3   | 1.722                                 | 20.25                                     | JET        | 80% after 330 h, 50°C, ambient, MPPT; 90% after 2000 h, 85% RH; 80% after 200 h, 85% °C, 85% RH; 86% after 200 thermal cycles - 40°C to 85°C | 10.1126/science.adj6088        | Gao et al., Science 383, 6685, 855-859 (2024)                 |  |
| 36 | Liu 2025          | C <sub>60</sub> / SnO <sub>x</sub> / Au / PEDOT:PSS / PK  | evap. / ALD / evap. / spin-coat / spin-coat     | not at RJ: 2D PK template for (100) WBG orientation                         | 29.7                         | 2.175               | 83.3   | 16.4                                  | 0.049 / 0.04888                           | JET        | 90% after 750 h, MPPT                                                                                                                        | 10.1038/s41563-024-02073-x     | Liu Z., Lin R., Wei M. et al., Nat. Mater. 24, 252-259 (2025) |  |
| 37 | Lian 2025         | PCBM / SnO <sub>2</sub> / Au / PEDOT:PSS / PK             | spin-coat / ALD / evap. / spin-coat             | not at RJ: crown-ether passivation                                          | 28.44                        | 2.14                | 81.31  | 16.36                                 | 0.1017 / 0.0678                           | SCM        | only WBG MPPT reported                                                                                                                       | 10.1038/s41467-025-62391-9     | Lian X. et al., Nat. Commun. 16, 7173 (2025)                  |  |
| 38 | Fitzsimmons 2025  | C <sub>60</sub> / GO / 2PACz / PK                         | evap / spin-coat / spin-coat / spin-coat        | graphene oxide with SAM replaces Au with PEDOT:PSS                          | 23.3                         | 1.94                | 77.7   | 15.4                                  | 0.12                                      | n.r.       | >100% after 100 h, 25 °C, N <sub>2</sub> , MPPT                                                                                              | 10.1021/acscenergylett.4c03065 | Fitzsimmons M.R. et al., ACS Energy Lett. 10, 713-725 (2025)  |  |
| 39 | Wei 2025          | C <sub>60</sub> / Cr / ITO / PEDOT:PSS / PK               | evap. / evap. / sputter / spin-coat / spin-coat | thin Cr acts as sputter-damage barrier, no ALD or Au                        | 26.56                        | 2.075               | 80.6   | 15.88                                 | 0.09                                      | n.r.       | 90% after 562 hours MPPT                                                                                                                     | 10.1039/D5TA04259C             | J. Mater. Chem. A (2025)                                      |  |

| #              | 1st author / Year | RJ stack (and adjacent layers, manufacture bottom to top)                                                                                                           | RJ Deposition                                                                                                          | RJ Key innovation                                                                                                               | PCE (%)                      | V <sub>oc</sub> (V) | FF (%)      | J <sub>sc</sub> (mA/cm <sup>2</sup> ) | Active / Aperture area (cm <sup>2</sup> ) | Cert. body | Stability metrics                                                                                           | DOI                            | Citation                                                          |
|----------------|-------------------|---------------------------------------------------------------------------------------------------------------------------------------------------------------------|------------------------------------------------------------------------------------------------------------------------|---------------------------------------------------------------------------------------------------------------------------------|------------------------------|---------------------|-------------|---------------------------------------|-------------------------------------------|------------|-------------------------------------------------------------------------------------------------------------|--------------------------------|-------------------------------------------------------------------|
|                |                   |                                                                                                                                                                     |                                                                                                                        |                                                                                                                                 | (lab if no certified report) |                     |             |                                       |                                           |            |                                                                                                             |                                |                                                                   |
| 40             | Lin 2025          | C <sub>60</sub> / SnO <sub>x</sub> / Au / PEDOT:PSS / SA / PK                                                                                                       | evap. / ALD / evap. / spin-coat / spin-coat / spin-coat                                                                | dipolar molecule tunes energy alignment for ohmic junction                                                                      | 30.6 / (30.1 stab.)          | 2.211               | 83.4        | 16.6                                  | 0.049 / 0.04934                           | JET        | 87% after 1,025 hours MPPT                                                                                  | 10.1038 /s41586 -025-09773-7   | Lin R., Gao H., Lou J., Tan H. et al., Nature 648, 600–606 (2025) |
| 41             | Sun 2026          | C <sub>60</sub> / SnO <sub>2</sub> / Au / P3CT-Cs / PK                                                                                                              | evap. / ALD / evap. / spin-coat / spin-coat                                                                            | not at RJ: CsOH forms stabilizing oxides on Sn–Pb against photothermal degradation                                              | 28.56                        | 2.126               | 82.61       | 16.23                                 | 0.0731                                    | SIMIT      | 90.3% after 500 h, ISOS-L-3 (65 °C); >80% after 150 h, ISOS-L-3 (85 °C) MPPT                                | 10.1038 /s41566 -025-01815-w   | Sun N., Fu S., Li Y. et al., Nat. Photon. 20, 273–279 (2026)      |
| 42             | Wang 2026         | C <sub>60</sub> / SnO <sub>2</sub> / Au / PEDOT:PSS / PK                                                                                                            | evap. / ALD / evap. / spin-coat / spin-coat                                                                            | SAM with H-bond network replacing PEDOT:PSS                                                                                     | 29.38 (28.4 stab.)           | 2.114               | 85.41       | 16.9                                  | 0.0686                                    | SIMIT      | 90% after 638 h, N <sub>2</sub> ISOS-L-1, MPPT; 90% after 420 h, ambient ISOS-L-1, MPPT                     | 10.1038 /s41560 -026-01964-4   | Wang et al., Nat. Energy 11, 436–448 (2026)                       |
| <b>Silicon</b> |                   |                                                                                                                                                                     |                                                                                                                        |                                                                                                                                 |                              | <b>Perovskite</b>   |             |                                       | <b>Perovskite</b>                         |            |                                                                                                             |                                |                                                                   |
| 43             | Choi 2023         | RJ1: ITO /PTAA/ PK<br>RJ2: C <sub>60</sub> / PEIE / ITO / SAM                                                                                                       | RJ1: Sputter/ spin-coat<br>RJ2: spin-coat / Sputter/ spin-coat                                                         | ALD-free, not at RJ: less damaging PK solvents                                                                                  | 22.23                        | 2.78                | 78.6        | 10.18                                 | n.r.                                      | n.r.       | n.r.                                                                                                        | 10.1021 /acsenergylett.3c00919 | ACS Energy Lett. 2023, 8, 7, 3141–3146                            |
| 44             | Liu 2024          | RJ1: a-Si / nc-SiO <sub>x</sub> / ITO / Me-4PACz / PK<br>RJ2: C <sub>60</sub> / SnO <sub>2</sub> / ITO / NiO <sub>x</sub> / Me-4PACz / PK                           | RJ1: PECVD / PECVD / sputter / spin-coat / spin-coat<br>RJ2: evap. / ALD / sputter / spin-coat / spin-coat / spin-coat | not at RJ: OCN additive for 1.93 eV PK                                                                                          | 27.10                        | 3.145               | 78.08       | 11.58                                 | 1 / 0.9988                                | SIMIT      | 96% after 700 h, ISOS-D-3 (65 °C, 85% RH); 80% after 300 h, ISOS-L-3 (65°C, 50% RH)                         | 10.1038 /s41586 -024-07226-1   | Liu S. et al., Nature 628, 306–312 (2024)                         |
| 45             | Xu F. 2024        | RJ1: a-Si / IZO / MeO-2PACz / PK<br>RJ2: C <sub>60</sub> / SnO <sub>2</sub> / IZO / NiO <sub>x</sub> / 2PACz                                                        | RJ1: Sputter/ spin-coat<br>RJ2: ALD/ Sputter/ spin-coat                                                                | not at RJ: KSCN additive                                                                                                        | 26.4 (26.2 stab.)            | 3.04                | 72.9        | 11.9                                  | 1                                         | n.r.       | 98% after 300 h, 25 °C, in N <sub>2</sub> , MPPT                                                            | 10.1016 /j.joule.2023.11.018   | Xu F. et al., Joule 8, 224–240 (2024)                             |
| 46             | Li F. 2024        | RJ1 : ITO / NiO <sub>x</sub> / 2PACz<br>RJ2 : LiF / C60 / ALD-SnO <sub>x</sub> / IZO                                                                                | evap. / ALD / sputter / spin                                                                                           | Early certified PK/PK/Si 3J; Voc ~3.0 V, 1 cm <sup>2</sup> aperture<br>RbCl alloying in the 1.96 eV wide-bandgap top perovskite | 25.0 / 24.19                 | 2.995 / n.r.        | 71.0 / n.r. | 11.76 / n.r.                          | 1.04 / 1.04                               | NIMTT      | unencapsulated tandem retained 86.8% of initial PCE after 100 h MPP under one-sun LED at 25 °C, 30 ± 10% RH | 10.1002 /adma.202311595        | Li F. et al., Adv. Mater. 36, 2311595 (2024)                      |
| 47             | Heydarian 2025    | RJ1: a-Si / ITO / PTAA / PFN / PK<br>RJ2: C <sub>60</sub> / SnO <sub>x</sub> / ZTO / 2PACz / PK                                                                     | RJ1: PECVD / sputter / spin-coat / spin-coat / spin-coat<br>RJ2: evap. / ALD / sputter / spin-coat / spin-coat         | indium-free sputtered RL for PK/PK/Si 3J                                                                                        | 21.9                         | 3.10                | 84.9        | 8.3                                   | 1                                         | n.r.       | n.r.                                                                                                        | 10.1002 /smll.202511646        | Heydarian M. et al., Small (2025) e202511646                      |
| 48             | Hu S. 2025        | All RJs: C60 / ALD-SnO <sub>x</sub> (~20 nm) / sputter IZO (~10 nm) — universal RJ + PEDOT:PSS for Sn–Pb                                                            | Evap+ALD+sputter+spin                                                                                                  | Amino-acid-salt (e.g., 4-FPhA-HCl) precursor chemistry enables Sn–Pb; universal ALD-SnO <sub>x</sub> /IZO RJ                    | 27.28                        | 3.428               | 78.4        | 10.2                                  | 1.003                                     | AIST       | T80 = 860 h (encapsulated, ~RH45)                                                                           | 10.1038 /s41586 -024-08546-y   | Hu S., Wang J., Zhao P. et al., Nature 639, 93–101 (2025)         |
| 49             | Artuk 2026        | RJ1: a-Si / nc-Si / ITO / Me-4PACz:2PACz / SiO <sub>x</sub> -np / PK<br>RJ2: C <sub>60</sub> / SnO <sub>x</sub> / IZO / Me-4PACz:4PABCz / SiO <sub>x</sub> -np / PK | RJ1: PECVD / PECVD / sputter / spin-coat / spin-coat / spin-coat<br>RJ2: evap. / ALD / sputter / spin-coat / spin-coat | SiO <sub>x</sub> nanoparticles improve current balance; not at RJ: perovskites optimized                                        | 30.44 (30.02 stab.)          | 3.207               | 81.31       | 11.373                                | 0.9743                                    | SIMIT      | 86.2% after 500 h, 85 °C, 85% RH, MPPT                                                                      | 10.1038 /s41586 -026-10385-y   | Artuk K., et al., Nature 653, 90–97 (2026)                        |

| #                            | 1st author / Year    | RJ stack (and adjacent layers, manufacture bottom to top)                                                                                    | RJ Deposition                                                                                                                          | RJ Key innovation                                                                                                                       | PCE (%)                    | V <sub>oc</sub> (V) | FF (%)  | J <sub>sc</sub> (mA/cm <sup>2</sup> ) | Active / Aperture area (cm <sup>2</sup> ) | Cert. body     | Stability metrics                                                                                                                          | DOI                          | Citation                                                                  |
|------------------------------|----------------------|----------------------------------------------------------------------------------------------------------------------------------------------|----------------------------------------------------------------------------------------------------------------------------------------|-----------------------------------------------------------------------------------------------------------------------------------------|----------------------------|---------------------|---------|---------------------------------------|-------------------------------------------|----------------|--------------------------------------------------------------------------------------------------------------------------------------------|------------------------------|---------------------------------------------------------------------------|
| (lab if no certified report) |                      |                                                                                                                                              |                                                                                                                                        |                                                                                                                                         |                            |                     |         |                                       |                                           |                |                                                                                                                                            |                              |                                                                           |
| Perovskite                   |                      |                                                                                                                                              | Perovskite                                                                                                                             |                                                                                                                                         |                            | Perovskite          |         |                                       | Perovskite                                |                |                                                                                                                                            | Perovskite                   |                                                                           |
| 50                           | Wang 2023            | RJ1: PCBM / PEIE / SnO <sub>x</sub> / ITO / NiO <sub>x</sub> / PACz / PK<br>RJ2: PCBM / PEIE / SnO <sub>x</sub> / Au / PEDOT:PSS             | RJ1: spin-coat / spin-coat / ALD / sputter / spin-coat / spin-coat / spin-coat<br>RJ2: spin-coat / spin-coat / ALD / evap. / spin-coat | not at RJ: suppression of phase segregation                                                                                             | 23.29                      | 3.181               | 76.2    | 9.61                                  | 0.0505                                    | NREL           | 80% after 420 h, RT, ambient, MPPT                                                                                                         | 10.1038/s41586-023-06006-7   | Wang Z., et al., Nature 618, 74-79 (2023)                                 |
| 51                           | Wang 2024            | RJ1: PCBM / PEI / SnO <sub>x</sub> / ITO / NiO <sub>x</sub> / Me-4PACz / PK<br>RJ2: C <sub>60</sub> / SnO <sub>x</sub> / Au / PEDOT:PSS / PK | RJ1: spin-coat / spin-coat / ALD / sputter / spin-coat / spin-coat / spin-coat<br>RJ2: evap. / ALD / evap. / spin-coat / spin-coat     | not at RJ: halide homogenization in WBG sub-cell                                                                                        | 23.87                      | 3.267               | 80.3    | 9.0921                                | 0.0508                                    | NREL           | 80% after 200 h, ambient, RT, MPPT                                                                                                         | 10.1038/s41560-023-01406-5   | Wang J., et al., Nat. Energy 9, 70-80 (2024)                              |
| 52                           | Hu S. 2025           | All RJs: C <sub>60</sub> / SnO <sub>x</sub> / IZO + PEDOT:PSS for Sn-Pb                                                                      | evap. / ALD / sputter / spin-coat                                                                                                      | not at RJ: First all-PK 4J; bandgap 2.26eV/1.80eV/1.55eV/1.26 eV                                                                        | 27.4 / 26.9                | 4.87 / 4.90         | 81 / 73 | 7.0 / 7.6                             | 0.25 / 1                                  | n.r.           | n.r.                                                                                                                                       | 10.1038/s41586-024-08546-y   | Hu S. et al., Nature 639, 93–101 (2025)                                   |
| CIGS                         |                      |                                                                                                                                              | CIGS                                                                                                                                   |                                                                                                                                         |                            | CIGS                |         |                                       | Perovskite                                |                |                                                                                                                                            | Perovskite                   |                                                                           |
| 53                           | Todo 2015            | PEDOT:PSS / ITO ~30 nm RJ / CdS / CIGS                                                                                                       | Sputter ITO; CBD CdS                                                                                                                   | ZnO-free monolithic interconnection using ITO directly on CdS, combined with in situ vapor halide-exchange bandgap engineering          | 10.9 /                     | 1.45 /              | 56.6 /  | 12.7 /                                | 0.40                                      | n.r.           | n.r.                                                                                                                                       | 10.1002/aenm.201500799       | Todorov T. et al., Adv. Energy Mater. 5, 1500799 (2015)                   |
| 54                           | Han 2018             | PTAA / polished ITO / BZO / i-ZnO / CdS                                                                                                      | Sputter + CMP polishing+ spin                                                                                                          | First ≥20% monolithic PK/CIGS; Nanoscale interface engineering of the CIGS surface via ITO + CMP smoothing, plus heavily doped PTAA HTL | 22.43 / 22.4               | 1.774               | 73.1    | 17.3                                  | 0.042                                     | NREL           | Unencapsulated tandem retained 88% after 500 h under continuous 1-sun MPP tracking at 30 °C ambient; recovered to 93% after 12 h dark rest | 10.1126/science.aat5055      | Han Q. et al., Science 361, 904–908 (2018)                                |
| 55                           | Al-Ashouri/Jost 2019 | SAM (2PACz-type) directly on rough as-deposited CIGS — no ALD, no CMP                                                                        | Solution SAM                                                                                                                           | Conformal SAM hole contact on rough as-deposited CIGS                                                                                   | 23.16 ; 23.26 (stabilized) | 1.68                | 71.9.   | 19.17                                 | 1.0347                                    | Fraunhofer ISE | n.r.                                                                                                                                       | 10.1039/C9EE02268F           | Al-Ashouri A., Magomedov A., Albrecht S. et al., EES 12, 3356–3369 (2019) |
| 56                           | Jost 2019            | ZnO:Al / ALD-NiOx / PTAA                                                                                                                     | ALD NiOx; spin PTAA                                                                                                                    | Conformal NiOx/PTAA bilayer HTL on rough as-grown CIGSe                                                                                 | 21.6                       | 1.58                | 76.0    | 18.0                                  | 0.778                                     | n.r.           | n.r.                                                                                                                                       | 10.1021/acsenrgylett.9b00135 | Jost M. et al., ACS Energy Lett. 4, 583–590 (2019)                        |
| 57                           | Jost 2022            | ZnO:Al / Me-4PACz                                                                                                                            | Sputter; solution SAM (dip coating)                                                                                                    | SAM-based HTL integration on rough, non-planarized CIGS, combined with PEAI additive in perovskite                                      | 24.2                       | 1.77                | 71.2    | 18.8                                  | 1.04                                      | Fraunhofer ISE | n.r.                                                                                                                                       | 10.1021/acsenrgylett.2c00274 | Jost M. et al., ACS Energy Lett. 7, 1298–1307 (2022)                      |
| 58                           | Kafedjiska 2023      | i-ZO/AZO/NiO:Cu/SAM                                                                                                                          | i-ZO, AZO, NiO:Cu: sputter                                                                                                             | Cu-doped NiO + SAM on CIGS                                                                                                              | 23.4                       | 1.72                | 71      | 19.5                                  | n.r.                                      | n.r.           | n.r.                                                                                                                                       | 10.1002/adfm.202302924       | Kafedjiska I. et al., Adv. Funct. Mater. 33, 2302924 (2023)               |
| 59                           | Jost 2025            | AZO / Au / NiO <sub>x</sub> / 4PADCB                                                                                                         | Sputter AZO; evap Au; ALD NiOx; spin SAM                                                                                               | Composite IRL (AZO/Au/NiOx/4PAD                                                                                                         | 30.71                      | 1.745               | 80.2    | 21.76                                 | 0.15                                      | n.r.           | T93.9 = 663h (unencap; N2 ;                                                                                                                | 10.1038/s41467               | Jost M. et al., Nat. Commun. (2025)                                       |

| #              | 1st author / Year   | RJ stack (and adjacent layers, manufacture bottom to top)         | RJ Deposition                                                            | RJ Key innovation                                                                 | PCE (%)                      | V <sub>oc</sub> (V) | FF (%) | J <sub>sc</sub> (mA/cm <sup>2</sup> ) | Active / Aperture area (cm <sup>2</sup> ) | Cert. body        | Stability metrics                                        | DOI                        | Citation                                                    |  |
|----------------|---------------------|-------------------------------------------------------------------|--------------------------------------------------------------------------|-----------------------------------------------------------------------------------|------------------------------|---------------------|--------|---------------------------------------|-------------------------------------------|-------------------|----------------------------------------------------------|----------------------------|-------------------------------------------------------------|--|
|                |                     |                                                                   |                                                                          |                                                                                   | (lab if no certified report) |                     |        |                                       |                                           |                   |                                                          | 25oC)                      | -025-67350-y                                                |  |
| 60             | Lin 2025            | ITO / NiO <sub>x</sub> / mixed SAM (MeO-2PACz+Me-4PACz 85:15 v/v) | ITO sputter ; NiOx, SAM spin                                             | Defect-passivation-failure-resistant TAR 3 passivator in the WBG perovskite,      | 28.23                        | 1.922               | 77.19  | 19.03                                 | 0.21                                      | SIMIT             | MPPT : no degradation after 420 h in air.                | 10.1038/s41560-025-01761-5 | Lin Y. et al., Nat. Energy 10, 824–835 (2025)               |  |
| 61             | Pei 2025            | ITO / NiO <sub>x</sub> / SAM                                      | ITO sputter ; NiOx, SAM spin                                             | Interconnection stress-relief engineering                                         | 28.24                        | 1.894               | 78.40  | 19.02                                 | 0.2018                                    | SIMIT             | T80 = 1123 h N2 ; ~40oC ;                                | 10.1021/jacs.5c13264       | Pei et al., JACS 147, 36815–36824 (2025)                    |  |
| 62             | Farias-Basulto 2025 | i-ZnO/AZO/NiO <sub>x</sub> /SAM                                   | i-ZnO, AZO: sputter NiOx: spin-coated nanoparticle solution              | Light management + bandgap engineering on 1.1 cm <sup>2</sup>                     | 24.6 (cert. SS)              | 1.765               | 71.8   | 19.29                                 | 1.105                                     | Fraunhofer ISE    | maintained over 500 s (Stabilized power output, SPO)     | 10.1021/acsami.5c15458     | Farias-Basulto G. et al., ACS AMI 17, 56250 (2025)          |  |
| 63             | Ying 2025           | ZnO:Al/i-ZnO/Me-4PACz                                             | ZnO:Al/i-ZnO: sputter (purchased)                                        | Flexible monolithic perovskite/CIGS, Antisolvent-seeded SAM                       | 23.8 (cert. SS)              | 1.75                | 77.2   | 17.6                                  | 1.09                                      | SIMIT             | MPPT T90= 320 h, Nbc-93= 3000 (bending radius: 10 mm)    | 10.1038/s41560-025-01760-6 | Ying Z. et al., Nat. Energy 10, 737 (2025)                  |  |
| 64             | Tang 2025           | i-ZnO/AZO/NiO <sub>x</sub> /4PAD CB                               | i-ZnO, AZO, NiOx: sputter                                                | Surface modification of RF sputtering-deposited NiOx films by SAM (4PADCB)        | 22.8                         | 1.82                | 74.1   | 16.9                                  | 0.07                                      | n.r.              | MPPT T77= 400 h Nbc-95= 20000 (bending radius: 7 mm)     | 10.1002/aenm.202403682     | Tang L. et al., Adv. Energy Mater. 15, 2403682 (2025)       |  |
| <b>Organic</b> |                     |                                                                   |                                                                          |                                                                                   |                              |                     |        |                                       |                                           | <b>Perovskite</b> |                                                          |                            |                                                             |  |
| 65             | Hiramoto 1990       | Me-PTC/H2Pc/Au/Me-PTC/H2Pc (Au between organic p-n junction)      | Au: thermal evaporation                                                  | First insertion of thin Au film between two unit cells                            | n.r.                         | 0.78                | n.r.   | ~0.018                                | n.r.                                      | n.r.              | n.r.                                                     | 10.1246/cl.1990.327        | Hiramoto M. et al., Chem. Lett. 19, 327 (1990)              |  |
| 66             | Liu 2016            | C60-SB / Ag / MoO <sub>3</sub>                                    | C60-SB: spin-coated Ag, MoO3: thermal evaporation                        | Graded zwitterionic fullerene recombination layer for perovskite/polymer-BHJ      | 16.0                         | 1.63                | 75.1   | 13.1                                  | 0.06                                      | n.r.              | n.r.                                                     | 10.1021/acsami.5b12740     | Liu Y. et al., ACS AMI 8, 7070 (2016)                       |  |
| 67             | Chen W. 2022        | BCP / IZO / MoO <sub>x</sub>                                      | BCP, IZO, MoOx: sputter                                                  | First sputtered IZO with high NIR transmittance                                   | 22.95                        | 2.065               | 74.7   | 14.88                                 | 0.08                                      | SIMIT             | MPPT T90> 500 h                                          | 10.1038/s41560-021-00966-8 | Chen W. et al., Nat. Energy 7, 229 (2022)                   |  |
| 68             | Brinkmann 2022      | SnO <sub>x</sub> / InO <sub>x</sub> / MoO <sub>x</sub>            | SnOx, InOx: ALD MoOx: thermal evaporation                                | First ALD-metal oxide (InOx) ICL replacing Ag NPs                                 | 23.1                         | 2.16                | 81.25  | 13.22                                 | 0.0174                                    | Fraunhofer ISE    | MPPT T80> 130 h                                          | 10.1038/s41586-022-04455-0 | Brinkmann K.O. et al., Nature 604, 280 (2022)               |  |
| 69             | Ma 2023             | C60 / C-C1-P / ITO / MoO <sub>3</sub>                             | evap. / spin-coat / sputter / evap.                                      | C-C1-P to avoid ITO sputter damage                                                | 24.07                        | 2.09                | 78.99  | 14.58                                 | n.r.                                      | n.r.              | 80% after 150 h, ambient, MPPT                           | 10.1002/adma.202307502     | Ma Z., et al., Adv. Mater., 35, 48, 2307502 (2023)          |  |
| 70             | Maksudov 2024       | SnO <sub>2</sub> / IZO / MoO <sub>x</sub> / 2PACz                 | SnO2: ALD IZO: sputter MoOx: thermal evaporation SAM(2PACz): spin-coated | Replaces parasitic Ag NP RJ to IZO (near-zero NIR parasitic absorption)           | 23.61                        | 2.10                | 77     | 14.56                                 | n.r.                                      | n.r.              | maintained over 10 min of continuous illumination (MPPT) | 10.1016/j.mser.2024.100802 | Maksudov T. et al., Mater. Sci. Eng. R, 159, 100802 (2024)  |  |
| 71             | Hwang 2024          | i-ZnO / ITO(ion-milled)                                           | i-ZnO, ITO: sputter                                                      | Intentionally deposited thicker ITO then flattened the top surface by ion-milling | 17.5                         | 1.46                | 68     | 17.67                                 | n.r.                                      | n.r.              | maintained over 1000 s (Stabilized power output, SPO)    | 10.1002/eem.212489         | Hwang S. K. et al., Energy Environ. Mater. 7, e12489 (2024) |  |
| 72             | Jiang X.            | SnO <sub>x</sub> / Au                                             | SnOx: ALD Au: thermal                                                    | Isomeric diammonium passivation (CyDAI2)                                          | 25.7                         | 2.157               | 77.82  | 15.303                                | 0.09                                      | CNAS              | MPPT T93= 700 h                                          | 10.1038/s41586             | Jiang X. et al., Nature 635, 860                            |  |

| #  | 1st author / Year | RJ stack (and adjacent layers, manufacture bottom to top)                                                         | RJ Deposition                                                                                      | RJ Key innovation                                                                                                                 | PCE (%)                      | V <sub>oc</sub> (V) | FF (%)            | J <sub>sc</sub> (mA/cm <sup>2</sup> ) | Active / Aperture area (cm <sup>2</sup> ) | Cert. body | Stability metrics                                     | DOI                            | Citation                                                         |  |
|----|-------------------|-------------------------------------------------------------------------------------------------------------------|----------------------------------------------------------------------------------------------------|-----------------------------------------------------------------------------------------------------------------------------------|------------------------------|---------------------|-------------------|---------------------------------------|-------------------------------------------|------------|-------------------------------------------------------|--------------------------------|------------------------------------------------------------------|--|
|    |                   |                                                                                                                   |                                                                                                    |                                                                                                                                   | (lab if no certified report) |                     |                   |                                       |                                           |            |                                                       |                                |                                                                  |  |
|    | 2024              |                                                                                                                   | evaporation                                                                                        | at WBG perovskite surface                                                                                                         |                              |                     |                   |                                       |                                           |            |                                                       | -024-08160-y                   | (2024)                                                           |  |
| 73 | An Y. 2025        | SnO <sub>2</sub> / Au / Ph-4PACz / MoO <sub>3</sub> / Ph-4PACz                                                    | SnO <sub>2</sub> : ALD<br>Au, MoO <sub>3</sub> : thermal evaporation<br>SAM(Ph-4PACz): spin-coated | SAM sandwiched structure between Au and MoO <sub>3</sub> , Balances carrier transport by adopting SAM on MoO <sub>3</sub> surface | 24.53                        | 2.216               | 80.65             | 13.725                                | 0.04                                      | Enli Tech. | MPPT T80> 650 h                                       | 10.1038/s41467-025-58047-3     | An Y. et al., Nat. Commun. 16, 2759 (2025)                       |  |
| 74 | Wang Y.-D. 2025   | SnO <sub>x</sub> / ITO / MoO <sub>x</sub>                                                                         | SnO <sub>x</sub> : ALD<br>ITO: sputter<br>MoO <sub>x</sub> : thermal evaporation                   | Face-on stacking by using PACl additive in WBG perovskite for hybrid-deposited tandem                                             | 25.82                        | 2.125               | 80.87             | 15.03                                 | 0.0503                                    | SIMIT      | MPPT T90= 400 h                                       | 10.1038/s41467-025-61404-x     | Wang Y.-D. et al., Nat. Commun. 16, 6142 (2025)                  |  |
| 75 | Sun X. 2025       | BCP / Ag / MoO <sub>x</sub> / TCB-treated 4PADCB                                                                  | BCP, Ag, MoO <sub>x</sub> : thermal evaporation<br>TCB-treated SAM(4PADCB): spin-coated            | Highly ordered SAM by using opposite electrostatic potential TCB additive                                                         | 26.09                        | 2.131               | 81.90             | 14.95                                 | n.r.                                      | n.r.       | maintained over 300 s (Stabilized power output, SPO)  | 10.1039/d4ee05533k             | Sun X. et al., EES 18, 2536 (2025)                               |  |
| 76 | Jia Z. 2025       | SnO <sub>x</sub> / ITO / MoO <sub>x</sub>                                                                         | SnO <sub>x</sub> : ALD<br>ITO: sputter<br>MoO <sub>x</sub> : thermal evaporation                   | NIR-harvesting asymmetric non-fullerene acceptor P2EH-1V                                                                          | 26.4                         | 2.124               | 82.78             | 15.02                                 | 1.019                                     | SIMIT      | MPPT T80= 783 h                                       | 10.1038/s41586-025-09181-x     | Jia Z. et al., Nature 643, 104 (2025)                            |  |
| 77 | Tian 2025         | PEDOT:F / Au / ZnO / PFN-Br                                                                                       | Au: thermal evaporation<br>PEDOT:F, ZnO NPs, PFN-Br: spin-coated                                   | Surface-energy engineering tunes Au NP morphology to minimize LSPR loss                                                           | 25.34                        | 2.23                | 75.75             | 14.98                                 | 0.038                                     | n.r.       | maintained over 1000 s (Stabilized power output, SPO) | 10.1038/s41467-024-55376-7     | Tian J. et al., Nat. Commun. 16, 154 (2025)                      |  |
| 78 | He 2025           | C <sub>60</sub> / PEI / ITO / V <sub>2</sub> O <sub>5</sub>                                                       | evap. / spin-coat / sputter / evap.                                                                | V <sub>2</sub> O <sub>5</sub> instead of MoO <sub>3</sub> improves optical and electric RJ properties                             | 25.1                         | 2.10                | 81.1              | 14.68                                 | n.r.                                      | n.r.       | 90% after 450 h, N <sub>2</sub> , RT, MPPT            | 10.1038/s41467-025-57093-1     | He Z., et al., Nat. Commun., 16, 1773 (2025)                     |  |
|    |                   | <b>Organic</b>                                                                                                    |                                                                                                    |                                                                                                                                   |                              |                     | <b>Perovskite</b> |                                       |                                           |            | <b>Perovskite</b>                                     |                                |                                                                  |  |
| 79 | Isikgor or 2022   | RJ1: C <sub>60</sub> / BCP / IZO / NiO <sub>x</sub> / N719<br>RJ2: C <sub>60</sub> / BCP / IZO / MoO <sub>3</sub> | RJ1: evap. / evap. / sputter / spin-coat / spin-coat<br>RJ2: evap. / evap. / sputter / evap.       | First 3J perovskite-perovskite-organic                                                                                            | 19.4                         | 3.03                | 70.4              | 9.1                                   | 0.1                                       | n.r.       | n.r.                                                  | 10.1021/acseenergylett.2c02340 | Isikgor F. H., et al., ACS Energy Lett., 7, 12, 4469-4471 (2022) |  |
